# Supplementary material for: Structure and dynamics of concentrated hydrochloric acid solutions. A first principles molecular dynamics study
Source: Royal Society of Chemistry journal article supplement (doi:10.1039/b307279g), 2004-01-01
Supplement: b307279g.pdf [file b307279g.pdf]

This Journal is © the Owner Societies 2004

Electronic supplementary information for *PCCP*

Number of atoms with this many neighbours during the simulation on average

Cl\* refers to CID chlorine atoms (defined by having a D within 1.55Å)

Cl- refers to the rest of Cl atoms, i.e. chloride ions (defined by not having a D within 1.55Å)

|            | \Sigma | average<br>coordinati<br>on # | 0     | 1     | 2     | 3      | 4     | 5     | 6     | 7     | 8     | 9     | cut off for<br>coordination<br>number definition |
|------------|--------|-------------------------------|-------|-------|-------|--------|-------|-------|-------|-------|-------|-------|--------------------------------------------------|
| 10:22 330K |        |                               |       |       |       |        |       |       |       |       |       |       | 10:22 330K                                       |
| n(O)       | 21.992 | 1.924                         | 1.329 | 6.623 | 7.891 | 4.697  | 1.437 | 0.015 | 0.000 | 0.000 | 0.000 | 0.000 | OO R < 3.0Å                                      |
| n(O)       | 21.991 | 1.513                         | 4.212 | 6.366 | 7.588 | 3.548  | 0.276 | 0.001 | 0.000 | 0.000 | 0.000 | 0.000 | OCI R < 3.5Å                                     |
| n(Cl)      | 9.995  | 3.329                         | 0.089 | 0.998 | 1.791 | 2.263  | 2.761 | 1.711 | 0.354 | 0.025 | 0.003 | 0.000 | CIO R < 3.5Å                                     |
| n(Cl)      | 9.997  | 3.853                         | 0.014 | 0.269 | 0.963 | 2.278  | 3.593 | 2.225 | 0.588 | 0.061 | 0.006 | 0.000 | CIX R < 3.5Å                                     |
| n(Cl)      | 9.996  | 0.523                         | 5.595 | 3.590 | 0.792 | 0.019  | 0.000 | 0.000 | 0.000 | 0.000 | 0.000 | 0.000 | CICI R < 3.5Å                                    |
| n(O)       | 21.992 | 3.351                         | 0.000 | 0.000 | 0.000 | 14.258 | 7.712 | 0.022 | 0.000 | 0.000 | 0.000 | 0.000 | OD R < 2.5Å                                      |
| n(Cl)      | 9.999  | 3.415                         | 0.000 | 0.802 | 1.476 | 2.159  | 3.918 | 1.618 | 0.026 | 0.000 | 0.000 | 0.000 | CID R < 2.75Å                                    |
| n(CID)     | 2.991  | 2.000                         | 0.000 | 0.801 | 1.427 | 0.724  | 0.039 | 0.000 | 0.000 | 0.000 | 0.000 | 0.000 | Cl*D R < 2.75                                    |
| n(Cl-)     | 7.008  | 4.162                         | 0.000 | 0.001 | 0.049 | 1.435  | 3.879 | 1.618 | 0.026 | 0.000 | 0.000 | 0.000 | Cl-D R < 2.75                                    |
| 10:22 470K |        |                               |       |       |       |        |       |       |       |       |       |       | 10:22 470K                                       |
| n(O)       | 21.997 | 1.942                         | 0.934 | 6.260 | 8.873 | 5.053  | 0.831 | 0.046 | 0.000 | 0.000 | 0.000 | 0.000 | OO R < 3.0Å                                      |
| n(O)       | 21.999 | 1.465                         | 3.406 | 8.676 | 6.815 | 2.517  | 0.558 | 0.023 | 0.004 | 0.000 | 0.000 | 0.000 | OCI R < 3.5Å                                     |
| n(Cl)      | 9.999  | 0.729                         | 4.063 | 4.647 | 1.224 | 0.065  | 0.000 | 0.000 | 0.000 | 0.000 | 0.000 | 0.000 | CIO R < 3.5Å                                     |
| n(Cl)      | 9.999  | 3.952                         | 0.050 | 0.215 | 0.916 | 2.396  | 3.115 | 2.271 | 0.821 | 0.189 | 0.020 | 0.006 | CIX R < 3.5Å                                     |
| n(Cl)      | 9.999  | 0.729                         | 4.063 | 4.647 | 1.224 | 0.065  | 0.000 | 0.000 | 0.000 | 0.000 | 0.000 | 0.000 | CICI R < 3.5Å                                    |
| n(O)       | 21.998 | 3.446                         | 0.000 | 0.000 | 0.139 | 12.582 | 8.616 | 0.649 | 0.012 | 0.000 | 0.000 | 0.000 | OD R < 2.5Å                                      |
| n(Cl)      | 9.999  | 3.107                         | 0.000 | 0.955 | 2.509 | 2.667  | 2.491 | 1.153 | 0.198 | 0.026 | 0.000 | 0.000 | CID R < 2.75Å                                    |
| n(CID)     | 4.916  | 2.266                         | 0.000 | 0.951 | 2.206 | 1.312  | 0.398 | 0.046 | 0.003 | 0.000 | 0.000 | 0.000 | Cl*D R < 2.75                                    |
| n(Cl-)     | 5.083  | 0.000                         | 0.000 | 0.004 | 0.303 | 1.355  | 2.093 | 1.107 | 0.195 | 0.026 | 0.000 | 0.000 | Cl-D R < 2.75                                    |
| 10:22 909K |        |                               |       |       |       |        |       |       |       |       |       |       | 10:22 909K                                       |
| n(O)       | 21.998 | 1.853                         | 1.550 | 6.558 | 8.689 | 4.120  | 0.977 | 0.065 | 0.034 | 0.005 | 0.000 | 0.000 | OO R < 3.0Å                                      |
| n(O)       | 21.995 | 1.463                         | 3.420 | 8.530 | 6.852 | 2.854  | 0.304 | 0.029 | 0.006 | 0.000 | 0.000 | 0.000 | OCI R < 3.5Å                                     |
| n(Cl)      | 9.998  | 3.219                         | 0.145 | 0.757 | 2.029 | 3.039  | 2.336 | 1.286 | 0.354 | 0.052 | 0.000 | 0.000 | CIO R < 3.5Å                                     |
| n(Cl)      | 9.999  | 4.211                         | 0.022 | 0.176 | 0.765 | 1.864  | 3.052 | 2.502 | 1.271 | 0.309 | 0.038 | 0.000 | CIX R < 3.5Å                                     |
| n(Cl)      | 9.998  | 0.991                         | 3.003 | 4.617 | 1.903 | 0.410  | 0.065 | 0.000 | 0.000 | 0.000 | 0.000 | 0.000 | CICI R < 3.5Å                                    |
| n(O)       | 21.995 | 3.546                         | 0.000 | 0.000 | 1.063 | 10.413 | 8.242 | 2.008 | 0.250 | 0.019 | 0.000 | 0.000 | OD R < 2.5Å                                      |
| n(Cl)      | 9.997  | 3.003                         | 0.000 | 0.771 | 2.608 | 3.472  | 2.242 | 0.776 | 0.118 | 0.010 | 0.000 | 0.000 | CID R < 2.75Å                                    |
| n(CID)     | 6.861  | 2.697                         | 0.000 | 0.762 | 2.264 | 2.454  | 1.084 | 0.266 | 0.031 | 0.000 | 0.000 | 0.000 | Cl*D R < 2.75                                    |
| n(Cl-)     | 3.136  | 0.000                         | 0.000 | 0.009 | 0.344 | 1.018  | 1.158 | 0.510 | 0.087 | 0.010 | 0.000 | 0.000 | Cl-D R < 2.75                                    |

Electronic supplementary information for *PCCP*

7:25 340K

|        |        |       |       |        |       |        |        |       |       |       |       |       |               |
|--------|--------|-------|-------|--------|-------|--------|--------|-------|-------|-------|-------|-------|---------------|
| n(O)   | 24.999 | 2.291 | 0.040 | 4.856  | 9.816 | 8.383  | 1.883  | 0.021 | 0.000 | 0.000 | 0.000 | 0.000 | 7:25 340K     |
| n(O)   | 24.998 | 1.029 | 5.678 | 13.549 | 5.149 | 0.613  | 0.009  | 0.000 | 0.000 | 0.000 | 0.000 | 0.000 | OO R < 3.0Å   |
| n(Cl)  | 6.998  | 3.675 | 0.096 | 0.426  | 0.780 | 1.697  | 1.934  | 1.531 | 0.488 | 0.046 | 0.000 | 0.000 | OCI R < 3.5Å  |
| n(Cl)  | 6.998  | 4.139 | 0.023 | 0.148  | 0.526 | 1.185  | 2.255  | 2.062 | 0.718 | 0.077 | 0.004 | 0.000 | CIO R < 3.5Å  |
| n(Cl)  | 7.000  | 0.464 | 3.880 | 2.995  | 0.121 | 0.004  | 0.000  | 0.000 | 0.000 | 0.000 | 0.000 | 0.000 | CIX R < 3.5Å  |
| n(O)   | 24.998 | 3.480 | 0.000 | 0.000  | 0.014 | 13.201 | 11.540 | 0.243 | 0.000 | 0.000 | 0.000 | 0.000 | CICI R < 3.5Å |
| n(Cl)  | 7.000  | 3.716 | 0.000 | 0.666  | 1.098 | 0.932  | 1.642  | 2.204 | 0.439 | 0.019 | 0.000 | 0.000 | OD R < 2.5Å   |
| n(CID) | 1.981  | 1.824 | 0.000 | 0.657  | 1.039 | 0.263  | 0.020  | 0.002 | 0.000 | 0.000 | 0.000 | 0.000 | CID R < 2.75Å |
| n(Cl-) | 5.019  | 0.000 | 0.000 | 0.009  | 0.059 | 0.669  | 1.622  | 2.202 | 0.439 | 0.019 | 0.000 | 0.000 | Cl*D R < 2.75 |
|        |        |       |       |        |       |        |        |       |       |       |       |       | Cl-D R < 2.75 |

4:28 290K

|        |        |                   |        |        |        |        |        |       |       |       |       |       |               |
|--------|--------|-------------------|--------|--------|--------|--------|--------|-------|-------|-------|-------|-------|---------------|
| n(O)   | 27.999 | 2.466             | 0.128  | 3.482  | 10.534 | 11.007 | 2.773  | 0.066 | 0.009 | 0.000 | 0.000 | 0.000 | 4:28 290K     |
| n(O)   | 27.997 | 0.686             | 11.015 | 14.780 | 2.178  | 0.024  | 0.000  | 0.000 | 0.000 | 0.000 | 0.000 | 0.000 | OO R < 3.0Å   |
| n(Cl)  | 4.000  | 4.802             | 0.000  | 0.000  | 0.001  | 0.225  | 1.280  | 1.646 | 0.760 | 0.082 | 0.006 | 0.000 | OCI R < 3.5Å  |
| n(Cl)  | 4.000  | 4.802             | 0.000  | 0.000  | 0.001  | 0.225  | 1.280  | 1.646 | 0.760 | 0.082 | 0.006 | 0.000 | CIO R < 3.5Å  |
| n(Cl)  | 4.000  | 0.000             | 4.000  | 0.000  | 0.000  | 0.000  | 0.000  | 0.000 | 0.000 | 0.000 | 0.000 | 0.000 | CIX R < 3.5Å  |
| n(O)   | 27.997 | 3.583             | 0.000  | 0.000  | 0.011  | 12.455 | 14.741 | 0.782 | 0.008 | 0.000 | 0.000 | 0.000 | CICI R < 3.5Å |
| n(Cl)  | 3.999  | 4.562             | 0.000  | 0.000  | 0.010  | 0.238  | 1.772  | 1.453 | 0.526 | 0.000 | 0.000 | 0.000 | OD R < 2.5Å   |
| n(CID) | 0.000  | no CID -molecules |        |        |        |        |        |       |       |       |       |       | CID R < 2.75Å |
| n(Cl-) | 3.999  | 0.000             | 0.000  | 0.000  | 0.010  | 0.238  | 1.772  | 1.453 | 0.526 | 0.000 | 0.000 | 0.000 | Cl*D R < 2.75 |
|        |        |                   |        |        |        |        |        |       |       |       |       |       | Cl-D R < 2.75 |

Pair correlation functions of each simulation.

system 4:28 DCI:D2O, RDF

| r [Å] | g(O,O) | g(O,Cl) | g(O,D) | g(Cl,Cl) | g(Cl,D) | g(D,D) |
|-------|--------|---------|--------|----------|---------|--------|
| 0.043 | 0.000  | 0.000   | 0.000  | 0.000    | 0.000   | 0.000  |
| 0.086 | 0.000  | 0.000   | 0.000  | 0.000    | 0.000   | 0.000  |
| 0.129 | 0.000  | 0.000   | 0.000  | 0.000    | 0.000   | 0.000  |
| 0.172 | 0.000  | 0.000   | 0.000  | 0.000    | 0.000   | 0.000  |
| 0.214 | 0.000  | 0.000   | 0.000  | 0.000    | 0.000   | 0.000  |
| 0.257 | 0.000  | 0.000   | 0.000  | 0.000    | 0.000   | 0.000  |
| 0.300 | 0.000  | 0.000   | 0.000  | 0.000    | 0.000   | 0.000  |
| 0.343 | 0.000  | 0.000   | 0.000  | 0.000    | 0.000   | 0.000  |
| 0.386 | 0.000  | 0.000   | 0.000  | 0.000    | 0.000   | 0.000  |
| 0.429 | 0.000  | 0.000   | 0.000  | 0.000    | 0.000   | 0.000  |
| 0.472 | 0.000  | 0.000   | 0.000  | 0.000    | 0.000   | 0.000  |
| 0.515 | 0.000  | 0.000   | 0.000  | 0.000    | 0.000   | 0.000  |
| 0.557 | 0.000  | 0.000   | 0.000  | 0.000    | 0.000   | 0.000  |
| 0.600 | 0.000  | 0.000   | 0.000  | 0.000    | 0.000   | 0.000  |
| 0.643 | 0.000  | 0.000   | 0.000  | 0.000    | 0.000   | 0.000  |
| 0.686 | 0.000  | 0.000   | 0.000  | 0.000    | 0.000   | 0.000  |
| 0.729 | 0.000  | 0.000   | 0.000  | 0.000    | 0.000   | 0.000  |
| 0.772 | 0.000  | 0.000   | 0.000  | 0.000    | 0.000   | 0.000  |
| 0.815 | 0.000  | 0.000   | 0.000  | 0.000    | 0.000   | 0.000  |
| 0.857 | 0.000  | 0.000   | 0.000  | 0.000    | 0.000   | 0.000  |
| 0.900 | 0.000  | 0.000   | 0.008  | 0.000    | 0.000   | 0.000  |
| 0.943 | 0.000  | 0.000   | 2.218  | 0.000    | 0.000   | 0.000  |

Electronic supplementary information for *PCCP*

|       |       |       |        |       |       |       |
|-------|-------|-------|--------|-------|-------|-------|
| 0.986 | 0.000 | 0.000 | 23.971 | 0.000 | 0.000 | 0.000 |
| 1.029 | 0.000 | 0.000 | 26.493 | 0.000 | 0.000 | 0.000 |
| 1.072 | 0.000 | 0.000 | 8.025  | 0.000 | 0.000 | 0.000 |
| 1.115 | 0.000 | 0.000 | 2.200  | 0.000 | 0.000 | 0.000 |
| 1.158 | 0.000 | 0.000 | 0.956  | 0.000 | 0.000 | 0.000 |
| 1.200 | 0.000 | 0.000 | 0.619  | 0.000 | 0.000 | 0.000 |
| 1.243 | 0.000 | 0.000 | 0.501  | 0.000 | 0.030 | 0.000 |
| 1.286 | 0.000 | 0.000 | 0.440  | 0.000 | 0.024 | 0.000 |
| 1.329 | 0.000 | 0.000 | 0.468  | 0.000 | 0.020 | 0.000 |
| 1.372 | 0.000 | 0.000 | 0.511  | 0.000 | 0.025 | 0.000 |
| 1.415 | 0.000 | 0.000 | 0.554  | 0.000 | 0.037 | 0.008 |
| 1.458 | 0.000 | 0.000 | 0.595  | 0.000 | 0.013 | 0.083 |
| 1.501 | 0.000 | 0.000 | 0.662  | 0.000 | 0.005 | 0.443 |
| 1.543 | 0.000 | 0.000 | 0.719  | 0.000 | 0.009 | 1.325 |
| 1.586 | 0.000 | 0.000 | 0.812  | 0.000 | 0.022 | 2.409 |
| 1.629 | 0.000 | 0.000 | 0.852  | 0.000 | 0.026 | 2.717 |
| 1.672 | 0.000 | 0.000 | 0.909  | 0.000 | 0.047 | 2.152 |
| 1.715 | 0.000 | 0.000 | 0.910  | 0.000 | 0.104 | 1.446 |
| 1.758 | 0.000 | 0.000 | 0.877  | 0.000 | 0.183 | 1.011 |
| 1.801 | 0.000 | 0.000 | 0.833  | 0.000 | 0.296 | 0.828 |
| 1.844 | 0.000 | 0.000 | 0.766  | 0.000 | 0.508 | 0.734 |
| 1.886 | 0.000 | 0.000 | 0.669  | 0.000 | 0.835 | 0.710 |
| 1.929 | 0.000 | 0.000 | 0.582  | 0.000 | 1.147 | 0.714 |
| 1.972 | 0.000 | 0.000 | 0.493  | 0.000 | 1.510 | 0.742 |
| 2.015 | 0.000 | 0.000 | 0.434  | 0.000 | 1.845 | 0.825 |
| 2.058 | 0.000 | 0.000 | 0.370  | 0.000 | 2.069 | 0.888 |
| 2.101 | 0.000 | 0.000 | 0.309  | 0.000 | 2.139 | 0.961 |
| 2.144 | 0.000 | 0.000 | 0.248  | 0.000 | 2.201 | 1.030 |
| 2.187 | 0.000 | 0.000 | 0.210  | 0.000 | 2.099 | 1.081 |
| 2.229 | 0.000 | 0.000 | 0.178  | 0.000 | 2.002 | 1.103 |
| 2.272 | 0.001 | 0.000 | 0.146  | 0.000 | 1.787 | 1.090 |
| 2.315 | 0.013 | 0.000 | 0.137  | 0.000 | 1.589 | 1.062 |
| 2.358 | 0.117 | 0.000 | 0.128  | 0.000 | 1.325 | 1.023 |
| 2.401 | 0.456 | 0.000 | 0.124  | 0.000 | 1.141 | 0.976 |
| 2.444 | 0.937 | 0.000 | 0.122  | 0.000 | 0.984 | 0.894 |
| 2.487 | 1.340 | 0.000 | 0.122  | 0.000 | 0.777 | 0.828 |
| 2.530 | 1.507 | 0.000 | 0.129  | 0.000 | 0.643 | 0.776 |
| 2.572 | 1.608 | 0.000 | 0.140  | 0.000 | 0.594 | 0.733 |
| 2.615 | 1.756 | 0.000 | 0.162  | 0.000 | 0.459 | 0.687 |
| 2.658 | 1.882 | 0.000 | 0.195  | 0.000 | 0.409 | 0.652 |
| 2.701 | 1.967 | 0.013 | 0.242  | 0.000 | 0.385 | 0.618 |
| 2.744 | 1.873 | 0.038 | 0.315  | 0.000 | 0.369 | 0.610 |
| 2.787 | 1.805 | 0.159 | 0.413  | 0.000 | 0.335 | 0.606 |
| 2.830 | 1.660 | 0.336 | 0.546  | 0.000 | 0.335 | 0.604 |
| 2.872 | 1.500 | 0.669 | 0.686  | 0.000 | 0.332 | 0.612 |
| 2.915 | 1.286 | 1.120 | 0.862  | 0.000 | 0.330 | 0.634 |
| 2.958 | 1.183 | 1.666 | 1.027  | 0.000 | 0.370 | 0.667 |
| 3.001 | 1.060 | 2.144 | 1.197  | 0.000 | 0.388 | 0.702 |
| 3.044 | 0.947 | 2.600 | 1.349  | 0.000 | 0.433 | 0.730 |
| 3.087 | 0.883 | 2.696 | 1.451  | 0.000 | 0.496 | 0.764 |
| 3.130 | 0.836 | 2.687 | 1.552  | 0.000 | 0.572 | 0.813 |
| 3.173 | 0.792 | 2.671 | 1.588  | 0.000 | 0.664 | 0.848 |
| 3.215 | 0.773 | 2.498 | 1.594  | 0.000 | 0.759 | 0.890 |
| 3.258 | 0.761 | 2.292 | 1.556  | 0.000 | 0.874 | 0.924 |
| 3.301 | 0.792 | 2.002 | 1.525  | 0.000 | 1.031 | 0.958 |

This Journal is © the Owner Societies 2004

Electronic supplementary information for *PCCP*

|       |       |       |       |       |       |       |
|-------|-------|-------|-------|-------|-------|-------|
| 3.344 | 0.849 | 1.669 | 1.490 | 0.000 | 1.183 | 1.004 |
| 3.387 | 0.848 | 1.560 | 1.453 | 0.000 | 1.355 | 1.048 |
| 3.430 | 0.871 | 1.425 | 1.398 | 0.000 | 1.457 | 1.076 |
| 3.473 | 0.879 | 1.292 | 1.348 | 0.054 | 1.528 | 1.126 |
| 3.516 | 0.907 | 1.236 | 1.290 | 0.056 | 1.632 | 1.156 |
| 3.558 | 0.949 | 1.244 | 1.266 | 0.065 | 1.717 | 1.191 |
| 3.601 | 0.983 | 1.171 | 1.244 | 0.188 | 1.765 | 1.238 |
| 3.644 | 1.038 | 1.221 | 1.216 | 0.080 | 1.723 | 1.266 |
| 3.687 | 1.036 | 1.250 | 1.195 | 0.123 | 1.750 | 1.310 |
| 3.730 | 1.093 | 1.235 | 1.177 | 0.267 | 1.695 | 1.323 |
| 3.773 | 1.160 | 1.247 | 1.157 | 0.252 | 1.682 | 1.322 |
| 3.816 | 1.161 | 1.226 | 1.153 | 0.374 | 1.608 | 1.328 |
| 3.859 | 1.193 | 1.235 | 1.134 | 0.347 | 1.552 | 1.309 |
| 3.901 | 1.214 | 1.317 | 1.126 | 0.471 | 1.429 | 1.277 |
| 3.944 | 1.219 | 1.359 | 1.113 | 0.536 | 1.342 | 1.250 |
| 3.987 | 1.231 | 1.427 | 1.105 | 0.391 | 1.294 | 1.223 |
| 4.030 | 1.246 | 1.332 | 1.099 | 0.551 | 1.249 | 1.202 |
| 4.073 | 1.260 | 1.342 | 1.086 | 0.500 | 1.231 | 1.173 |
| 4.116 | 1.240 | 1.357 | 1.070 | 0.470 | 1.189 | 1.148 |
| 4.159 | 1.229 | 1.358 | 1.068 | 0.700 | 1.220 | 1.124 |
| 4.202 | 1.253 | 1.333 | 1.063 | 0.613 | 1.180 | 1.111 |
| 4.244 | 1.242 | 1.339 | 1.040 | 0.655 | 1.161 | 1.095 |
| 4.287 | 1.236 | 1.349 | 1.037 | 0.634 | 1.153 | 1.081 |
| 4.330 | 1.213 | 1.365 | 1.024 | 0.680 | 1.123 | 1.066 |
| 4.373 | 1.197 | 1.324 | 1.009 | 0.668 | 1.101 | 1.063 |
| 4.416 | 1.159 | 1.349 | 0.992 | 0.785 | 1.095 | 1.042 |
| 4.459 | 1.165 | 1.329 | 0.990 | 0.801 | 1.097 | 1.038 |
| 4.502 | 1.137 | 1.274 | 0.989 | 0.893 | 1.080 | 1.034 |
| 4.544 | 1.141 | 1.289 | 0.993 | 0.951 | 1.062 | 1.024 |
| 4.587 | 1.116 | 1.274 | 0.990 | 0.993 | 1.052 | 1.020 |
| 4.630 | 1.083 | 1.231 | 0.987 | 0.748 | 1.038 | 1.010 |
| 4.673 | 1.080 | 1.170 | 0.983 | 0.686 | 1.012 | 1.005 |
| 4.716 | 1.060 | 1.187 | 0.983 | 0.615 | 1.017 | 1.003 |
| 4.759 | 1.023 | 1.234 | 0.982 | 0.612 | 1.008 | 0.996 |
| 4.802 | 0.996 | 1.188 | 0.986 | 0.647 | 1.008 | 0.992 |
| 4.845 | 0.969 | 1.134 | 0.984 | 0.712 | 1.010 | 0.979 |
| 4.887 | 0.929 | 1.098 | 0.979 | 0.682 | 1.010 | 0.968 |
| 4.930 | 0.937 | 1.076 | 0.977 | 0.707 | 1.007 | 0.967 |
| 4.973 | 0.891 | 1.059 | 0.975 | 0.801 | 0.988 | 0.951 |
| 5.016 | 0.841 | 1.036 | 0.959 | 0.925 | 0.968 | 0.933 |
| 5.059 | 0.833 | 1.009 | 0.958 | 0.813 | 0.963 | 0.927 |
| 5.102 | 0.813 | 0.904 | 0.949 | 0.700 | 0.974 | 0.917 |
| 5.145 | 0.774 | 0.876 | 0.935 | 0.804 | 0.979 | 0.908 |
| 5.188 | 0.773 | 0.916 | 0.921 | 0.672 | 0.964 | 0.908 |
| 5.230 | 0.772 | 0.867 | 0.919 | 0.508 | 0.937 | 0.909 |
| 5.273 | 0.770 | 0.889 | 0.915 | 0.770 | 0.932 | 0.898 |
| 5.316 | 0.787 | 0.898 | 0.912 | 0.915 | 0.934 | 0.911 |
| 5.359 | 0.796 | 0.851 | 0.908 | 1.130 | 0.957 | 0.914 |
| 5.402 | 0.782 | 0.760 | 0.903 | 0.811 | 0.937 | 0.916 |
| 5.445 | 0.809 | 0.789 | 0.906 | 0.778 | 0.898 | 0.916 |
| 5.488 | 0.831 | 0.745 | 0.910 | 0.904 | 0.882 | 0.916 |
| 5.531 | 0.816 | 0.758 | 0.908 | 1.248 | 0.892 | 0.928 |
| 5.573 | 0.825 | 0.735 | 0.909 | 0.989 | 0.902 | 0.930 |
| 5.616 | 0.825 | 0.758 | 0.916 | 0.858 | 0.875 | 0.937 |
| 5.659 | 0.818 | 0.733 | 0.907 | 1.102 | 0.873 | 0.937 |

Electronic supplementary information for *PCCP*

|       |       |       |       |       |       |       |
|-------|-------|-------|-------|-------|-------|-------|
| 5.702 | 0.840 | 0.752 | 0.912 | 0.943 | 0.872 | 0.947 |
| 5.745 | 0.859 | 0.745 | 0.923 | 1.029 | 0.872 | 0.956 |
| 5.788 | 0.886 | 0.739 | 0.921 | 1.036 | 0.860 | 0.960 |
| 5.831 | 0.913 | 0.771 | 0.926 | 0.855 | 0.829 | 0.963 |
| 5.874 | 0.940 | 0.736 | 0.934 | 0.825 | 0.867 | 0.975 |
| 5.916 | 0.903 | 0.752 | 0.943 | 0.835 | 0.881 | 0.976 |
| 5.959 | 0.919 | 0.806 | 0.950 | 0.880 | 0.854 | 0.987 |
| 6.002 | 0.962 | 0.777 | 0.970 | 0.870 | 0.839 | 0.985 |
| 6.045 | 0.998 | 0.774 | 0.974 | 0.986 | 0.844 | 0.988 |
| 6.088 | 1.010 | 0.793 | 0.978 | 0.937 | 0.830 | 0.996 |
| 6.131 | 1.017 | 0.832 | 0.989 | 1.123 | 0.857 | 1.004 |
| 6.174 | 1.045 | 0.874 | 1.001 | 1.007 | 0.839 | 1.005 |
| 6.217 | 1.035 | 0.815 | 1.021 | 1.231 | 0.861 | 0.998 |
| 6.259 | 1.087 | 0.792 | 1.026 | 0.990 | 0.838 | 1.002 |
| 6.302 | 1.107 | 0.849 | 1.032 | 1.230 | 0.823 | 1.012 |
| 6.345 | 1.130 | 0.799 | 1.048 | 1.270 | 0.819 | 1.003 |
| 6.388 | 1.129 | 0.869 | 1.058 | 1.793 | 0.847 | 1.013 |
| 6.431 | 1.178 | 0.911 | 1.061 | 1.687 | 0.882 | 1.018 |
| 6.474 | 1.202 | 0.938 | 1.057 | 2.231 | 0.937 | 1.014 |
| 6.517 | 1.201 | 0.906 | 1.036 | 2.113 | 0.935 | 1.009 |
| 6.559 | 1.195 | 0.942 | 1.046 | 1.915 | 0.959 | 1.000 |
| 6.602 | 1.184 | 1.011 | 1.051 | 2.291 | 0.989 | 1.007 |
| 6.645 | 1.179 | 1.021 | 1.065 | 2.294 | 1.011 | 1.009 |
| 6.688 | 1.162 | 1.037 | 1.063 | 2.615 | 1.007 | 1.008 |
| 6.731 | 1.186 | 0.988 | 1.069 | 2.325 | 1.018 | 1.017 |
| 6.774 | 1.143 | 0.983 | 1.048 | 2.409 | 1.011 | 1.013 |
| 6.817 | 1.141 | 0.944 | 1.038 | 2.373 | 0.997 | 1.010 |
| 6.860 | 1.137 | 0.889 | 1.046 | 2.377 | 1.028 | 1.020 |
| 6.902 | 1.072 | 0.926 | 1.019 | 2.153 | 1.039 | 0.992 |
| 6.945 | 1.030 | 0.883 | 1.015 | 1.848 | 1.033 | 0.980 |
| 6.988 | 1.071 | 0.909 | 1.021 | 1.856 | 1.014 | 0.987 |

system 7:25 DC1:D2O, RDF

| r [Å] | g(O,O) | g(O,Cl) | g(O,D) | g(Cl,Cl) | g(Cl,D) | g(D,D) |
|-------|--------|---------|--------|----------|---------|--------|
| 0.043 | 0.000  | 0.000   | 0.000  | 0.000    | 0.000   | 0.000  |
| 0.087 | 0.000  | 0.000   | 0.000  | 0.000    | 0.000   | 0.000  |
| 0.130 | 0.000  | 0.000   | 0.000  | 0.000    | 0.000   | 0.000  |
| 0.174 | 0.000  | 0.000   | 0.000  | 0.000    | 0.000   | 0.000  |
| 0.217 | 0.000  | 0.000   | 0.000  | 0.000    | 0.000   | 0.000  |
| 0.261 | 0.000  | 0.000   | 0.000  | 0.000    | 0.000   | 0.000  |
| 0.304 | 0.000  | 0.000   | 0.000  | 0.000    | 0.000   | 0.000  |
| 0.348 | 0.000  | 0.000   | 0.000  | 0.000    | 0.000   | 0.000  |
| 0.391 | 0.000  | 0.000   | 0.000  | 0.000    | 0.000   | 0.000  |
| 0.435 | 0.000  | 0.000   | 0.000  | 0.000    | 0.000   | 0.000  |
| 0.478 | 0.000  | 0.000   | 0.000  | 0.000    | 0.000   | 0.000  |
| 0.521 | 0.000  | 0.000   | 0.000  | 0.000    | 0.000   | 0.000  |
| 0.565 | 0.000  | 0.000   | 0.000  | 0.000    | 0.000   | 0.000  |
| 0.608 | 0.000  | 0.000   | 0.000  | 0.000    | 0.000   | 0.000  |
| 0.652 | 0.000  | 0.000   | 0.000  | 0.000    | 0.000   | 0.000  |
| 0.695 | 0.000  | 0.000   | 0.000  | 0.000    | 0.000   | 0.000  |
| 0.739 | 0.000  | 0.000   | 0.000  | 0.000    | 0.000   | 0.000  |
| 0.782 | 0.000  | 0.000   | 0.000  | 0.000    | 0.000   | 0.000  |
| 0.826 | 0.000  | 0.000   | 0.000  | 0.000    | 0.000   | 0.000  |
| 0.869 | 0.000  | 0.000   | 0.000  | 0.000    | 0.000   | 0.000  |
| 0.912 | 0.000  | 0.000   | 0.031  | 0.000    | 0.000   | 0.000  |

This Journal is © the Owner Societies 2004

Electronic supplementary information for *PCCP*

|       |       |       |        |       |       |       |
|-------|-------|-------|--------|-------|-------|-------|
| 0.956 | 0.000 | 0.000 | 4.123  | 0.000 | 0.000 | 0.000 |
| 0.999 | 0.000 | 0.000 | 28.527 | 0.000 | 0.000 | 0.000 |
| 1.043 | 0.000 | 0.000 | 25.674 | 0.000 | 0.000 | 0.000 |
| 1.086 | 0.000 | 0.000 | 7.739  | 0.000 | 0.000 | 0.000 |
| 1.130 | 0.000 | 0.000 | 2.451  | 0.000 | 0.000 | 0.000 |
| 1.173 | 0.000 | 0.000 | 1.178  | 0.000 | 0.000 | 0.000 |
| 1.217 | 0.000 | 0.000 | 0.768  | 0.000 | 0.003 | 0.000 |
| 1.260 | 0.000 | 0.000 | 0.638  | 0.000 | 0.142 | 0.000 |
| 1.303 | 0.000 | 0.000 | 0.645  | 0.000 | 1.101 | 0.000 |
| 1.347 | 0.000 | 0.000 | 0.728  | 0.000 | 1.953 | 0.001 |
| 1.390 | 0.000 | 0.000 | 0.843  | 0.000 | 1.214 | 0.005 |
| 1.434 | 0.000 | 0.000 | 0.917  | 0.000 | 0.448 | 0.035 |
| 1.477 | 0.000 | 0.000 | 0.982  | 0.000 | 0.189 | 0.178 |
| 1.521 | 0.000 | 0.000 | 1.016  | 0.000 | 0.092 | 0.679 |
| 1.564 | 0.000 | 0.000 | 1.044  | 0.000 | 0.054 | 1.672 |
| 1.608 | 0.000 | 0.000 | 1.040  | 0.000 | 0.051 | 2.581 |
| 1.651 | 0.000 | 0.000 | 1.025  | 0.000 | 0.071 | 2.606 |
| 1.694 | 0.000 | 0.000 | 0.934  | 0.000 | 0.107 | 2.075 |
| 1.738 | 0.000 | 0.000 | 0.865  | 0.000 | 0.163 | 1.569 |
| 1.781 | 0.000 | 0.000 | 0.745  | 0.000 | 0.257 | 1.220 |
| 1.825 | 0.000 | 0.000 | 0.641  | 0.000 | 0.391 | 1.024 |
| 1.868 | 0.000 | 0.000 | 0.550  | 0.000 | 0.620 | 0.923 |
| 1.912 | 0.000 | 0.000 | 0.462  | 0.000 | 0.895 | 0.863 |
| 1.955 | 0.000 | 0.000 | 0.391  | 0.000 | 1.217 | 0.860 |
| 1.999 | 0.000 | 0.000 | 0.328  | 0.000 | 1.522 | 0.904 |
| 2.042 | 0.000 | 0.000 | 0.268  | 0.000 | 1.803 | 0.987 |
| 2.085 | 0.000 | 0.000 | 0.201  | 0.000 | 1.914 | 1.061 |
| 2.129 | 0.000 | 0.000 | 0.172  | 0.000 | 1.876 | 1.121 |
| 2.172 | 0.000 | 0.000 | 0.143  | 0.000 | 1.861 | 1.145 |
| 2.216 | 0.000 | 0.000 | 0.115  | 0.000 | 1.742 | 1.146 |
| 2.259 | 0.001 | 0.000 | 0.103  | 0.000 | 1.522 | 1.105 |
| 2.303 | 0.008 | 0.000 | 0.091  | 0.000 | 1.346 | 1.030 |
| 2.346 | 0.108 | 0.000 | 0.094  | 0.000 | 1.153 | 0.957 |
| 2.390 | 0.546 | 0.000 | 0.089  | 0.000 | 0.922 | 0.885 |
| 2.433 | 1.260 | 0.000 | 0.086  | 0.000 | 0.790 | 0.834 |
| 2.476 | 2.042 | 0.000 | 0.082  | 0.000 | 0.680 | 0.767 |
| 2.520 | 2.325 | 0.000 | 0.097  | 0.000 | 0.577 | 0.701 |
| 2.563 | 2.424 | 0.000 | 0.113  | 0.000 | 0.512 | 0.651 |
| 2.607 | 2.354 | 0.000 | 0.129  | 0.000 | 0.430 | 0.609 |
| 2.650 | 2.242 | 0.000 | 0.167  | 0.000 | 0.385 | 0.577 |
| 2.694 | 2.116 | 0.003 | 0.214  | 0.000 | 0.363 | 0.553 |
| 2.737 | 1.884 | 0.033 | 0.286  | 0.000 | 0.353 | 0.533 |
| 2.781 | 1.689 | 0.078 | 0.376  | 0.000 | 0.343 | 0.534 |
| 2.824 | 1.412 | 0.214 | 0.498  | 0.000 | 0.349 | 0.541 |
| 2.867 | 1.308 | 0.420 | 0.666  | 0.000 | 0.367 | 0.553 |
| 2.911 | 1.147 | 0.915 | 0.851  | 0.000 | 0.380 | 0.570 |
| 2.954 | 0.960 | 1.290 | 1.048  | 0.000 | 0.412 | 0.603 |
| 2.998 | 0.887 | 1.759 | 1.252  | 0.000 | 0.448 | 0.634 |
| 3.041 | 0.779 | 2.179 | 1.445  | 0.058 | 0.505 | 0.663 |
| 3.085 | 0.690 | 2.300 | 1.594  | 0.189 | 0.569 | 0.702 |
| 3.128 | 0.666 | 2.420 | 1.649  | 0.430 | 0.656 | 0.746 |
| 3.172 | 0.695 | 2.368 | 1.688  | 0.620 | 0.727 | 0.778 |
| 3.215 | 0.665 | 2.326 | 1.648  | 0.774 | 0.843 | 0.823 |
| 3.258 | 0.736 | 2.215 | 1.589  | 1.071 | 0.965 | 0.873 |
| 3.302 | 0.751 | 1.976 | 1.528  | 1.283 | 1.091 | 0.934 |

This Journal is © the Owner Societies 2004

Electronic supplementary information for *PCCP*

|       |       |       |       |       |       |       |
|-------|-------|-------|-------|-------|-------|-------|
| 3.345 | 0.772 | 1.737 | 1.451 | 1.732 | 1.209 | 0.998 |
| 3.389 | 0.772 | 1.617 | 1.393 | 1.681 | 1.320 | 1.046 |
| 3.432 | 0.816 | 1.612 | 1.340 | 1.654 | 1.438 | 1.100 |
| 3.476 | 0.795 | 1.575 | 1.283 | 1.606 | 1.469 | 1.150 |
| 3.519 | 0.781 | 1.393 | 1.242 | 1.167 | 1.505 | 1.197 |
| 3.563 | 0.817 | 1.308 | 1.214 | 1.251 | 1.530 | 1.240 |
| 3.606 | 0.858 | 1.246 | 1.203 | 1.318 | 1.555 | 1.285 |
| 3.649 | 0.877 | 1.316 | 1.171 | 1.086 | 1.550 | 1.318 |
| 3.693 | 0.902 | 1.301 | 1.147 | 1.077 | 1.508 | 1.332 |
| 3.736 | 0.924 | 1.276 | 1.144 | 1.075 | 1.497 | 1.358 |
| 3.780 | 0.998 | 1.203 | 1.118 | 1.161 | 1.440 | 1.375 |
| 3.823 | 1.054 | 1.157 | 1.108 | 1.039 | 1.433 | 1.361 |
| 3.867 | 1.061 | 1.209 | 1.120 | 1.153 | 1.372 | 1.329 |
| 3.910 | 1.140 | 1.211 | 1.103 | 1.118 | 1.311 | 1.308 |
| 3.954 | 1.210 | 1.263 | 1.096 | 1.385 | 1.287 | 1.271 |
| 3.997 | 1.210 | 1.227 | 1.088 | 1.299 | 1.283 | 1.237 |
| 4.040 | 1.264 | 1.200 | 1.069 | 1.199 | 1.271 | 1.215 |
| 4.084 | 1.296 | 1.202 | 1.063 | 1.297 | 1.203 | 1.196 |
| 4.127 | 1.337 | 1.211 | 1.068 | 1.010 | 1.206 | 1.173 |
| 4.171 | 1.406 | 1.172 | 1.064 | 0.992 | 1.175 | 1.146 |
| 4.214 | 1.346 | 1.160 | 1.048 | 1.148 | 1.148 | 1.140 |
| 4.258 | 1.357 | 1.134 | 1.047 | 1.060 | 1.150 | 1.126 |
| 4.301 | 1.347 | 1.229 | 1.046 | 1.026 | 1.123 | 1.104 |
| 4.345 | 1.370 | 1.229 | 1.047 | 1.012 | 1.100 | 1.088 |
| 4.388 | 1.338 | 1.201 | 1.033 | 0.963 | 1.092 | 1.072 |
| 4.431 | 1.338 | 1.204 | 1.025 | 0.917 | 1.107 | 1.064 |
| 4.475 | 1.266 | 1.188 | 1.010 | 0.947 | 1.115 | 1.045 |
| 4.518 | 1.225 | 1.142 | 1.002 | 1.005 | 1.110 | 1.014 |
| 4.562 | 1.221 | 1.235 | 1.013 | 0.981 | 1.068 | 1.012 |
| 4.605 | 1.176 | 1.225 | 1.013 | 0.898 | 1.021 | 1.003 |
| 4.649 | 1.155 | 1.215 | 1.007 | 1.055 | 1.028 | 0.985 |
| 4.692 | 1.091 | 1.159 | 1.008 | 1.256 | 1.004 | 0.983 |
| 4.736 | 1.098 | 1.125 | 1.023 | 1.061 | 1.003 | 0.985 |
| 4.779 | 1.068 | 1.097 | 1.015 | 0.901 | 1.000 | 0.983 |
| 4.822 | 1.007 | 1.112 | 1.009 | 0.899 | 1.003 | 0.969 |
| 4.866 | 0.950 | 1.081 | 1.027 | 0.965 | 1.017 | 0.965 |
| 4.909 | 0.906 | 1.073 | 1.024 | 0.868 | 1.002 | 0.958 |
| 4.953 | 0.898 | 1.075 | 1.020 | 0.822 | 0.990 | 0.959 |
| 4.996 | 0.847 | 1.016 | 1.029 | 0.819 | 0.965 | 0.956 |
| 5.040 | 0.813 | 1.014 | 1.011 | 0.888 | 0.976 | 0.937 |
| 5.083 | 0.773 | 0.942 | 0.983 | 0.799 | 0.980 | 0.925 |
| 5.127 | 0.759 | 0.936 | 0.969 | 0.769 | 0.972 | 0.920 |
| 5.170 | 0.723 | 0.904 | 0.952 | 0.854 | 0.939 | 0.928 |
| 5.213 | 0.730 | 0.877 | 0.933 | 0.726 | 0.951 | 0.923 |
| 5.257 | 0.708 | 0.882 | 0.922 | 0.678 | 0.973 | 0.915 |
| 5.300 | 0.692 | 0.873 | 0.909 | 0.654 | 0.982 | 0.911 |
| 5.344 | 0.688 | 0.917 | 0.891 | 0.675 | 0.992 | 0.913 |
| 5.387 | 0.695 | 0.902 | 0.875 | 0.678 | 0.977 | 0.911 |
| 5.431 | 0.703 | 0.895 | 0.861 | 0.761 | 0.970 | 0.911 |
| 5.474 | 0.710 | 0.895 | 0.851 | 0.730 | 0.945 | 0.922 |
| 5.518 | 0.693 | 0.874 | 0.839 | 0.563 | 0.945 | 0.919 |
| 5.561 | 0.712 | 0.889 | 0.841 | 0.626 | 0.929 | 0.912 |
| 5.604 | 0.717 | 0.898 | 0.831 | 0.628 | 0.935 | 0.916 |
| 5.648 | 0.755 | 0.861 | 0.847 | 0.623 | 0.946 | 0.922 |
| 5.691 | 0.759 | 0.856 | 0.846 | 0.653 | 0.960 | 0.919 |

Electronic supplementary information for *PCCP*

|       |       |       |       |       |       |       |
|-------|-------|-------|-------|-------|-------|-------|
| 5.735 | 0.755 | 0.890 | 0.854 | 0.599 | 0.961 | 0.911 |
| 5.778 | 0.799 | 0.963 | 0.856 | 0.579 | 0.938 | 0.907 |
| 5.822 | 0.849 | 1.000 | 0.858 | 0.539 | 0.946 | 0.911 |
| 5.865 | 0.886 | 0.958 | 0.869 | 0.539 | 0.956 | 0.930 |
| 5.909 | 0.962 | 0.959 | 0.886 | 0.522 | 0.958 | 0.934 |
| 5.952 | 0.937 | 0.934 | 0.894 | 0.560 | 0.950 | 0.931 |
| 5.995 | 0.941 | 0.941 | 0.906 | 0.657 | 0.950 | 0.942 |
| 6.039 | 0.943 | 0.964 | 0.903 | 0.651 | 0.956 | 0.949 |
| 6.082 | 1.042 | 0.949 | 0.913 | 0.763 | 0.945 | 0.953 |
| 6.126 | 1.041 | 0.957 | 0.923 | 0.807 | 0.941 | 0.966 |
| 6.169 | 1.009 | 0.992 | 0.940 | 0.842 | 0.948 | 0.967 |
| 6.213 | 1.043 | 1.002 | 0.950 | 0.873 | 0.929 | 0.965 |
| 6.256 | 1.062 | 1.031 | 0.966 | 0.854 | 0.939 | 0.974 |
| 6.300 | 1.082 | 1.032 | 0.971 | 0.888 | 0.938 | 0.985 |
| 6.343 | 1.072 | 0.994 | 0.973 | 1.139 | 0.932 | 1.002 |
| 6.386 | 1.115 | 0.995 | 0.995 | 1.244 | 0.944 | 0.996 |
| 6.430 | 1.130 | 1.048 | 1.007 | 1.051 | 0.917 | 1.006 |
| 6.473 | 1.133 | 1.042 | 1.025 | 1.009 | 0.965 | 1.015 |
| 6.517 | 1.109 | 1.003 | 1.042 | 0.976 | 0.934 | 1.009 |
| 6.560 | 1.109 | 1.016 | 1.051 | 1.166 | 0.924 | 1.009 |
| 6.604 | 1.136 | 0.971 | 1.065 | 1.386 | 0.935 | 1.009 |
| 6.647 | 1.129 | 1.005 | 1.072 | 1.329 | 0.935 | 1.023 |
| 6.691 | 1.165 | 0.948 | 1.080 | 1.296 | 0.952 | 1.038 |
| 6.734 | 1.183 | 1.027 | 1.099 | 1.337 | 0.963 | 1.034 |
| 6.777 | 1.169 | 1.019 | 1.107 | 1.514 | 0.959 | 1.031 |
| 6.821 | 1.150 | 0.948 | 1.098 | 1.391 | 0.986 | 1.025 |
| 6.864 | 1.134 | 0.898 | 1.101 | 1.589 | 0.976 | 1.033 |
| 6.908 | 1.140 | 0.871 | 1.124 | 1.770 | 0.955 | 1.013 |
| 6.951 | 1.082 | 0.862 | 1.127 | 1.449 | 0.945 | 1.022 |
| 6.995 | 1.048 | 0.896 | 1.133 | 1.436 | 0.963 | 1.034 |

system 10:22 DCl:D2O, 330K, RDF

| r [Å] | g(O,O) | g(O,Cl) | g(O,D) | g(Cl,Cl) | g(Cl,D) | g(D,D) |
|-------|--------|---------|--------|----------|---------|--------|
| 0.044 | 0.000  | 0.000   | 0.000  | 0.000    | 0.000   | 0.000  |
| 0.087 | 0.000  | 0.000   | 0.000  | 0.000    | 0.000   | 0.000  |
| 0.131 | 0.000  | 0.000   | 0.000  | 0.000    | 0.000   | 0.000  |
| 0.174 | 0.000  | 0.000   | 0.000  | 0.000    | 0.000   | 0.000  |
| 0.218 | 0.000  | 0.000   | 0.000  | 0.000    | 0.000   | 0.000  |
| 0.261 | 0.000  | 0.000   | 0.000  | 0.000    | 0.000   | 0.000  |
| 0.305 | 0.000  | 0.000   | 0.000  | 0.000    | 0.000   | 0.000  |
| 0.349 | 0.000  | 0.000   | 0.000  | 0.000    | 0.000   | 0.000  |
| 0.392 | 0.000  | 0.000   | 0.000  | 0.000    | 0.000   | 0.000  |
| 0.436 | 0.000  | 0.000   | 0.000  | 0.000    | 0.000   | 0.000  |
| 0.479 | 0.000  | 0.000   | 0.000  | 0.000    | 0.000   | 0.000  |
| 0.523 | 0.000  | 0.000   | 0.000  | 0.000    | 0.000   | 0.000  |
| 0.566 | 0.000  | 0.000   | 0.000  | 0.000    | 0.000   | 0.000  |
| 0.610 | 0.000  | 0.000   | 0.000  | 0.000    | 0.000   | 0.000  |
| 0.653 | 0.000  | 0.000   | 0.000  | 0.000    | 0.000   | 0.000  |
| 0.697 | 0.000  | 0.000   | 0.000  | 0.000    | 0.000   | 0.000  |
| 0.741 | 0.000  | 0.000   | 0.000  | 0.000    | 0.000   | 0.000  |
| 0.784 | 0.000  | 0.000   | 0.000  | 0.000    | 0.000   | 0.000  |
| 0.828 | 0.000  | 0.000   | 0.000  | 0.000    | 0.000   | 0.000  |
| 0.871 | 0.000  | 0.000   | 0.000  | 0.000    | 0.000   | 0.000  |
| 0.915 | 0.000  | 0.000   | 0.025  | 0.000    | 0.000   | 0.000  |
| 0.958 | 0.000  | 0.000   | 4.805  | 0.000    | 0.000   | 0.000  |



Electronic supplementary information for *PCCP*

|       |       |       |        |       |       |       |
|-------|-------|-------|--------|-------|-------|-------|
| 1.002 | 0.000 | 0.000 | 30.444 | 0.000 | 0.000 | 0.000 |
| 1.045 | 0.000 | 0.000 | 26.934 | 0.000 | 0.000 | 0.000 |
| 1.089 | 0.000 | 0.000 | 9.542  | 0.000 | 0.000 | 0.000 |
| 1.133 | 0.000 | 0.000 | 3.543  | 0.000 | 0.000 | 0.000 |
| 1.176 | 0.000 | 0.000 | 1.656  | 0.000 | 0.000 | 0.000 |
| 1.220 | 0.000 | 0.000 | 1.056  | 0.000 | 0.000 | 0.000 |
| 1.263 | 0.000 | 0.000 | 0.862  | 0.000 | 0.214 | 0.000 |
| 1.307 | 0.000 | 0.000 | 0.825  | 0.000 | 1.921 | 0.000 |
| 1.350 | 0.000 | 0.000 | 0.905  | 0.000 | 1.987 | 0.000 |
| 1.394 | 0.000 | 0.000 | 0.967  | 0.000 | 1.038 | 0.001 |
| 1.438 | 0.000 | 0.000 | 0.998  | 0.000 | 0.394 | 0.022 |
| 1.481 | 0.000 | 0.000 | 1.005  | 0.000 | 0.175 | 0.151 |
| 1.525 | 0.000 | 0.000 | 0.966  | 0.000 | 0.107 | 0.601 |
| 1.568 | 0.000 | 0.000 | 0.928  | 0.000 | 0.096 | 1.459 |
| 1.612 | 0.000 | 0.000 | 0.866  | 0.000 | 0.141 | 2.458 |
| 1.655 | 0.000 | 0.000 | 0.815  | 0.000 | 0.214 | 2.795 |
| 1.699 | 0.000 | 0.000 | 0.740  | 0.000 | 0.331 | 2.519 |
| 1.742 | 0.000 | 0.000 | 0.647  | 0.000 | 0.540 | 2.069 |
| 1.786 | 0.000 | 0.000 | 0.528  | 0.000 | 0.810 | 1.746 |
| 1.830 | 0.000 | 0.000 | 0.442  | 0.000 | 1.082 | 1.445 |
| 1.873 | 0.000 | 0.000 | 0.376  | 0.000 | 1.260 | 1.189 |
| 1.917 | 0.000 | 0.000 | 0.315  | 0.000 | 1.401 | 1.024 |
| 1.960 | 0.000 | 0.000 | 0.261  | 0.000 | 1.536 | 0.948 |
| 2.004 | 0.000 | 0.000 | 0.242  | 0.000 | 1.632 | 0.931 |
| 2.047 | 0.000 | 0.000 | 0.193  | 0.000 | 1.696 | 0.943 |
| 2.091 | 0.000 | 0.000 | 0.143  | 0.000 | 1.719 | 0.940 |
| 2.134 | 0.000 | 0.000 | 0.119  | 0.000 | 1.626 | 0.927 |
| 2.178 | 0.000 | 0.000 | 0.099  | 0.000 | 1.549 | 0.910 |
| 2.222 | 0.000 | 0.000 | 0.094  | 0.000 | 1.362 | 0.879 |
| 2.265 | 0.003 | 0.000 | 0.089  | 0.000 | 1.211 | 0.837 |
| 2.309 | 0.027 | 0.000 | 0.072  | 0.000 | 1.024 | 0.785 |
| 2.352 | 0.185 | 0.000 | 0.066  | 0.000 | 0.852 | 0.727 |
| 2.396 | 0.816 | 0.000 | 0.071  | 0.000 | 0.720 | 0.661 |
| 2.439 | 1.788 | 0.000 | 0.077  | 0.000 | 0.636 | 0.604 |
| 2.483 | 2.602 | 0.000 | 0.075  | 0.000 | 0.543 | 0.567 |
| 2.527 | 2.659 | 0.000 | 0.080  | 0.000 | 0.435 | 0.553 |
| 2.570 | 2.471 | 0.000 | 0.094  | 0.000 | 0.406 | 0.526 |
| 2.614 | 2.284 | 0.000 | 0.119  | 0.000 | 0.364 | 0.526 |
| 2.657 | 1.959 | 0.001 | 0.172  | 0.000 | 0.339 | 0.514 |
| 2.701 | 1.899 | 0.046 | 0.244  | 0.000 | 0.329 | 0.521 |
| 2.744 | 1.507 | 0.171 | 0.321  | 0.000 | 0.310 | 0.517 |
| 2.788 | 1.284 | 0.423 | 0.451  | 0.000 | 0.298 | 0.544 |
| 2.831 | 1.169 | 0.887 | 0.591  | 0.000 | 0.297 | 0.561 |
| 2.875 | 0.987 | 1.383 | 0.757  | 0.000 | 0.321 | 0.567 |
| 2.919 | 0.927 | 1.705 | 0.946  | 0.000 | 0.339 | 0.604 |
| 2.962 | 0.906 | 1.908 | 1.187  | 0.011 | 0.370 | 0.644 |
| 3.006 | 0.795 | 2.172 | 1.380  | 0.053 | 0.429 | 0.698 |
| 3.049 | 0.733 | 2.305 | 1.520  | 0.081 | 0.477 | 0.743 |
| 3.093 | 0.740 | 2.321 | 1.615  | 0.222 | 0.566 | 0.796 |
| 3.136 | 0.761 | 2.317 | 1.654  | 0.341 | 0.649 | 0.848 |
| 3.180 | 0.769 | 2.256 | 1.670  | 0.581 | 0.756 | 0.895 |
| 3.223 | 0.753 | 2.017 | 1.623  | 0.883 | 0.862 | 0.945 |
| 3.267 | 0.728 | 1.848 | 1.569  | 0.974 | 0.989 | 1.002 |
| 3.311 | 0.799 | 1.630 | 1.509  | 1.121 | 1.106 | 1.043 |
| 3.354 | 0.819 | 1.556 | 1.426  | 1.100 | 1.231 | 1.110 |

Electronic supplementary information for *PCCP*

|       |       |       |       |       |       |       |
|-------|-------|-------|-------|-------|-------|-------|
| 3.398 | 0.833 | 1.415 | 1.384 | 1.312 | 1.404 | 1.172 |
| 3.441 | 0.873 | 1.421 | 1.337 | 1.333 | 1.495 | 1.201 |
| 3.485 | 0.880 | 1.265 | 1.307 | 1.146 | 1.606 | 1.247 |
| 3.528 | 0.913 | 1.267 | 1.257 | 1.230 | 1.609 | 1.286 |
| 3.572 | 1.017 | 1.254 | 1.248 | 1.095 | 1.592 | 1.319 |
| 3.615 | 1.049 | 1.240 | 1.234 | 1.197 | 1.600 | 1.340 |
| 3.659 | 1.165 | 1.318 | 1.201 | 1.321 | 1.585 | 1.369 |
| 3.703 | 1.172 | 1.315 | 1.199 | 1.428 | 1.563 | 1.393 |
| 3.746 | 1.183 | 1.214 | 1.181 | 1.603 | 1.512 | 1.387 |
| 3.790 | 1.210 | 1.240 | 1.173 | 1.547 | 1.496 | 1.366 |
| 3.833 | 1.198 | 1.237 | 1.156 | 1.580 | 1.442 | 1.343 |
| 3.877 | 1.233 | 1.222 | 1.146 | 1.566 | 1.401 | 1.320 |
| 3.920 | 1.276 | 1.207 | 1.154 | 1.610 | 1.351 | 1.295 |
| 3.964 | 1.255 | 1.152 | 1.151 | 1.578 | 1.334 | 1.265 |
| 4.008 | 1.268 | 1.176 | 1.148 | 1.586 | 1.270 | 1.220 |
| 4.051 | 1.259 | 1.189 | 1.107 | 1.709 | 1.241 | 1.189 |
| 4.095 | 1.307 | 1.208 | 1.114 | 1.586 | 1.203 | 1.169 |
| 4.138 | 1.356 | 1.233 | 1.116 | 1.519 | 1.187 | 1.154 |
| 4.182 | 1.339 | 1.218 | 1.094 | 1.402 | 1.166 | 1.128 |
| 4.225 | 1.345 | 1.261 | 1.103 | 1.439 | 1.164 | 1.111 |
| 4.269 | 1.369 | 1.239 | 1.100 | 1.376 | 1.150 | 1.088 |
| 4.312 | 1.308 | 1.258 | 1.090 | 1.337 | 1.130 | 1.078 |
| 4.356 | 1.286 | 1.192 | 1.066 | 1.463 | 1.114 | 1.062 |
| 4.400 | 1.278 | 1.228 | 1.071 | 1.333 | 1.093 | 1.043 |
| 4.443 | 1.275 | 1.208 | 1.048 | 1.219 | 1.083 | 1.040 |
| 4.487 | 1.198 | 1.178 | 1.035 | 1.282 | 1.066 | 1.021 |
| 4.530 | 1.173 | 1.167 | 1.019 | 1.172 | 1.052 | 1.018 |
| 4.574 | 1.093 | 1.231 | 1.019 | 1.118 | 1.031 | 1.024 |
| 4.617 | 1.053 | 1.205 | 1.035 | 1.179 | 1.001 | 1.021 |
| 4.661 | 1.043 | 1.100 | 1.022 | 1.077 | 0.974 | 1.005 |
| 4.704 | 1.006 | 1.050 | 1.006 | 1.032 | 0.977 | 0.999 |
| 4.748 | 1.010 | 1.007 | 1.005 | 0.943 | 0.953 | 0.994 |
| 4.792 | 0.971 | 1.020 | 0.984 | 0.951 | 0.959 | 0.988 |
| 4.835 | 0.959 | 1.003 | 0.978 | 1.014 | 0.961 | 0.994 |
| 4.879 | 0.845 | 0.951 | 0.976 | 0.876 | 0.942 | 0.984 |
| 4.922 | 0.825 | 0.900 | 0.962 | 0.990 | 0.962 | 0.968 |
| 4.966 | 0.799 | 0.872 | 0.966 | 0.941 | 0.955 | 0.968 |
| 5.009 | 0.789 | 0.852 | 0.958 | 0.975 | 0.954 | 0.964 |
| 5.053 | 0.804 | 0.821 | 0.939 | 0.869 | 0.930 | 0.941 |
| 5.097 | 0.760 | 0.788 | 0.922 | 0.888 | 0.917 | 0.940 |
| 5.140 | 0.802 | 0.791 | 0.911 | 0.864 | 0.930 | 0.927 |
| 5.184 | 0.828 | 0.761 | 0.917 | 0.862 | 0.921 | 0.917 |
| 5.227 | 0.786 | 0.706 | 0.897 | 0.811 | 0.926 | 0.911 |
| 5.271 | 0.786 | 0.673 | 0.881 | 0.742 | 0.903 | 0.887 |
| 5.314 | 0.792 | 0.685 | 0.883 | 0.793 | 0.914 | 0.888 |
| 5.358 | 0.829 | 0.698 | 0.878 | 0.812 | 0.926 | 0.883 |
| 5.401 | 0.840 | 0.677 | 0.874 | 0.786 | 0.923 | 0.892 |
| 5.445 | 0.802 | 0.721 | 0.864 | 0.807 | 0.916 | 0.896 |
| 5.489 | 0.773 | 0.720 | 0.857 | 0.819 | 0.916 | 0.900 |
| 5.532 | 0.805 | 0.774 | 0.867 | 0.907 | 0.891 | 0.906 |
| 5.576 | 0.769 | 0.757 | 0.878 | 0.852 | 0.881 | 0.910 |
| 5.619 | 0.800 | 0.747 | 0.873 | 0.795 | 0.877 | 0.919 |
| 5.663 | 0.813 | 0.788 | 0.863 | 0.841 | 0.856 | 0.913 |
| 5.706 | 0.838 | 0.799 | 0.859 | 0.871 | 0.852 | 0.930 |
| 5.750 | 0.852 | 0.864 | 0.869 | 0.812 | 0.860 | 0.935 |

Electronic supplementary information for *PCCP*

|       |       |       |       |       |       |       |
|-------|-------|-------|-------|-------|-------|-------|
| 5.793 | 0.795 | 0.922 | 0.869 | 0.686 | 0.871 | 0.934 |
| 5.837 | 0.847 | 0.950 | 0.895 | 0.843 | 0.864 | 0.944 |
| 5.881 | 0.849 | 1.005 | 0.874 | 0.781 | 0.871 | 0.943 |
| 5.924 | 0.885 | 0.997 | 0.876 | 0.799 | 0.881 | 0.948 |
| 5.968 | 0.904 | 1.070 | 0.892 | 0.834 | 0.903 | 0.941 |
| 6.011 | 0.878 | 1.062 | 0.894 | 0.843 | 0.892 | 0.959 |
| 6.055 | 0.891 | 1.086 | 0.897 | 0.845 | 0.912 | 0.944 |
| 6.098 | 0.937 | 1.158 | 0.902 | 0.731 | 0.935 | 0.941 |
| 6.142 | 0.930 | 1.175 | 0.918 | 0.705 | 0.948 | 0.934 |
| 6.186 | 0.947 | 1.143 | 0.935 | 0.754 | 0.973 | 0.939 |
| 6.229 | 0.949 | 1.111 | 0.946 | 0.783 | 1.000 | 0.929 |
| 6.273 | 0.951 | 1.107 | 0.974 | 0.784 | 1.032 | 0.925 |
| 6.316 | 1.042 | 1.101 | 0.972 | 0.779 | 1.077 | 0.932 |
| 6.360 | 0.959 | 1.135 | 0.994 | 0.811 | 1.088 | 0.938 |
| 6.403 | 0.952 | 1.163 | 0.995 | 0.859 | 1.083 | 0.947 |
| 6.447 | 1.037 | 1.232 | 1.017 | 0.891 | 1.084 | 0.963 |
| 6.490 | 0.974 | 1.241 | 1.026 | 0.813 | 1.097 | 0.963 |
| 6.534 | 0.971 | 1.206 | 1.029 | 0.662 | 1.119 | 0.967 |
| 6.578 | 1.019 | 1.249 | 1.047 | 0.802 | 1.141 | 0.979 |
| 6.621 | 0.970 | 1.340 | 1.025 | 0.864 | 1.118 | 0.993 |
| 6.665 | 0.986 | 1.298 | 1.041 | 0.997 | 1.196 | 1.000 |
| 6.708 | 0.958 | 1.354 | 1.044 | 1.132 | 1.234 | 0.991 |
| 6.752 | 0.981 | 1.310 | 1.049 | 1.059 | 1.234 | 1.018 |
| 6.795 | 1.028 | 1.336 | 1.030 | 1.002 | 1.228 | 1.027 |
| 6.839 | 1.079 | 1.371 | 1.006 | 1.079 | 1.235 | 1.025 |
| 6.882 | 1.104 | 1.334 | 1.008 | 1.138 | 1.238 | 1.046 |
| 6.926 | 1.082 | 1.250 | 0.991 | 1.195 | 1.227 | 1.049 |
| 6.970 | 1.039 | 1.135 | 0.998 | 0.991 | 1.250 | 1.051 |

system 10:22 DCl:D2O, 470K, RDF

| r [Å] | g(O,O) | g(O,Cl) | g(O,D) | g(Cl,Cl) | g(Cl,D) | g(D,D) |
|-------|--------|---------|--------|----------|---------|--------|
| 0.044 | 0.000  | 0.000   | 0.000  | 0.000    | 0.000   | 0.000  |
| 0.087 | 0.000  | 0.000   | 0.000  | 0.000    | 0.000   | 0.000  |
| 0.131 | 0.000  | 0.000   | 0.000  | 0.000    | 0.000   | 0.000  |
| 0.174 | 0.000  | 0.000   | 0.000  | 0.000    | 0.000   | 0.000  |
| 0.218 | 0.000  | 0.000   | 0.000  | 0.000    | 0.000   | 0.000  |
| 0.261 | 0.000  | 0.000   | 0.000  | 0.000    | 0.000   | 0.000  |
| 0.305 | 0.000  | 0.000   | 0.000  | 0.000    | 0.000   | 0.000  |
| 0.349 | 0.000  | 0.000   | 0.000  | 0.000    | 0.000   | 0.000  |
| 0.392 | 0.000  | 0.000   | 0.000  | 0.000    | 0.000   | 0.000  |
| 0.436 | 0.000  | 0.000   | 0.000  | 0.000    | 0.000   | 0.000  |
| 0.479 | 0.000  | 0.000   | 0.000  | 0.000    | 0.000   | 0.000  |
| 0.523 | 0.000  | 0.000   | 0.000  | 0.000    | 0.000   | 0.000  |
| 0.566 | 0.000  | 0.000   | 0.000  | 0.000    | 0.000   | 0.000  |
| 0.610 | 0.000  | 0.000   | 0.000  | 0.000    | 0.000   | 0.000  |
| 0.653 | 0.000  | 0.000   | 0.000  | 0.000    | 0.000   | 0.000  |
| 0.697 | 0.000  | 0.000   | 0.000  | 0.000    | 0.000   | 0.000  |
| 0.741 | 0.000  | 0.000   | 0.000  | 0.000    | 0.000   | 0.000  |
| 0.784 | 0.000  | 0.000   | 0.000  | 0.000    | 0.000   | 0.000  |
| 0.828 | 0.000  | 0.000   | 0.000  | 0.000    | 0.000   | 0.000  |
| 0.871 | 0.000  | 0.000   | 0.000  | 0.000    | 0.000   | 0.000  |
| 0.915 | 0.000  | 0.000   | 0.205  | 0.000    | 0.000   | 0.000  |
| 0.958 | 0.000  | 0.000   | 9.132  | 0.000    | 0.000   | 0.000  |
| 1.002 | 0.000  | 0.000   | 29.732 | 0.000    | 0.000   | 0.000  |
| 1.045 | 0.000  | 0.000   | 23.091 | 0.000    | 0.000   | 0.000  |

Electronic supplementary information for *PCCP*

|       |       |       |       |       |       |       |
|-------|-------|-------|-------|-------|-------|-------|
| 1.089 | 0.000 | 0.000 | 8.267 | 0.000 | 0.000 | 0.000 |
| 1.133 | 0.000 | 0.000 | 2.949 | 0.000 | 0.000 | 0.000 |
| 1.176 | 0.000 | 0.000 | 1.529 | 0.000 | 0.001 | 0.000 |
| 1.220 | 0.000 | 0.000 | 1.039 | 0.000 | 0.137 | 0.000 |
| 1.263 | 0.000 | 0.000 | 0.854 | 0.000 | 0.898 | 0.000 |
| 1.307 | 0.000 | 0.000 | 0.811 | 0.000 | 2.339 | 0.000 |
| 1.350 | 0.000 | 0.000 | 0.799 | 0.000 | 2.531 | 0.003 |
| 1.394 | 0.000 | 0.000 | 0.761 | 0.000 | 1.613 | 0.027 |
| 1.438 | 0.000 | 0.000 | 0.765 | 0.000 | 0.857 | 0.163 |
| 1.481 | 0.000 | 0.000 | 0.770 | 0.000 | 0.446 | 0.499 |
| 1.525 | 0.000 | 0.000 | 0.784 | 0.000 | 0.323 | 1.161 |
| 1.568 | 0.000 | 0.000 | 0.779 | 0.000 | 0.259 | 1.899 |
| 1.612 | 0.000 | 0.000 | 0.754 | 0.000 | 0.293 | 2.338 |
| 1.655 | 0.000 | 0.000 | 0.758 | 0.000 | 0.324 | 2.335 |
| 1.699 | 0.000 | 0.000 | 0.702 | 0.000 | 0.375 | 2.004 |
| 1.742 | 0.000 | 0.000 | 0.632 | 0.000 | 0.460 | 1.641 |
| 1.786 | 0.000 | 0.000 | 0.589 | 0.000 | 0.547 | 1.361 |
| 1.830 | 0.000 | 0.000 | 0.557 | 0.000 | 0.668 | 1.168 |
| 1.873 | 0.000 | 0.000 | 0.497 | 0.000 | 0.779 | 1.011 |
| 1.917 | 0.000 | 0.000 | 0.448 | 0.000 | 0.872 | 0.937 |
| 1.960 | 0.000 | 0.000 | 0.387 | 0.000 | 0.940 | 0.901 |
| 2.004 | 0.000 | 0.000 | 0.340 | 0.000 | 0.976 | 0.887 |
| 2.047 | 0.000 | 0.000 | 0.290 | 0.000 | 1.046 | 0.899 |
| 2.091 | 0.000 | 0.000 | 0.261 | 0.000 | 1.029 | 0.873 |
| 2.134 | 0.000 | 0.000 | 0.243 | 0.000 | 0.986 | 0.887 |
| 2.178 | 0.000 | 0.000 | 0.229 | 0.000 | 0.941 | 0.893 |
| 2.222 | 0.000 | 0.000 | 0.216 | 0.000 | 0.945 | 0.870 |
| 2.265 | 0.011 | 0.000 | 0.208 | 0.000 | 0.883 | 0.856 |
| 2.309 | 0.087 | 0.000 | 0.199 | 0.000 | 0.818 | 0.844 |
| 2.352 | 0.338 | 0.000 | 0.198 | 0.000 | 0.798 | 0.818 |
| 2.396 | 0.861 | 0.000 | 0.197 | 0.000 | 0.727 | 0.799 |
| 2.439 | 1.659 | 0.000 | 0.203 | 0.000 | 0.698 | 0.748 |
| 2.483 | 1.986 | 0.000 | 0.231 | 0.000 | 0.668 | 0.740 |
| 2.527 | 2.074 | 0.002 | 0.254 | 0.000 | 0.617 | 0.736 |
| 2.570 | 2.055 | 0.002 | 0.299 | 0.000 | 0.586 | 0.731 |
| 2.614 | 1.910 | 0.023 | 0.343 | 0.000 | 0.559 | 0.731 |
| 2.657 | 2.010 | 0.054 | 0.397 | 0.000 | 0.547 | 0.706 |
| 2.701 | 1.799 | 0.123 | 0.498 | 0.000 | 0.574 | 0.703 |
| 2.744 | 1.706 | 0.296 | 0.599 | 0.000 | 0.570 | 0.692 |
| 2.788 | 1.552 | 0.535 | 0.693 | 0.000 | 0.580 | 0.712 |
| 2.831 | 1.416 | 0.811 | 0.820 | 0.016 | 0.609 | 0.742 |
| 2.875 | 1.316 | 1.133 | 0.956 | 0.013 | 0.661 | 0.769 |
| 2.919 | 1.205 | 1.372 | 1.071 | 0.015 | 0.689 | 0.781 |
| 2.962 | 1.217 | 1.456 | 1.197 | 0.024 | 0.727 | 0.794 |
| 3.006 | 1.199 | 1.670 | 1.292 | 0.080 | 0.753 | 0.823 |
| 3.049 | 1.124 | 1.795 | 1.361 | 0.301 | 0.838 | 0.848 |
| 3.093 | 1.043 | 1.881 | 1.411 | 0.537 | 0.915 | 0.888 |
| 3.136 | 1.053 | 1.851 | 1.479 | 0.811 | 0.966 | 0.915 |
| 3.180 | 1.025 | 1.993 | 1.487 | 1.023 | 1.038 | 0.930 |
| 3.223 | 0.981 | 1.995 | 1.484 | 0.992 | 1.108 | 0.969 |
| 3.267 | 0.919 | 1.865 | 1.443 | 1.265 | 1.215 | 1.004 |
| 3.311 | 0.957 | 1.791 | 1.428 | 1.340 | 1.273 | 1.024 |
| 3.354 | 0.942 | 1.908 | 1.412 | 1.468 | 1.341 | 1.048 |
| 3.398 | 0.913 | 1.750 | 1.341 | 1.537 | 1.370 | 1.068 |
| 3.441 | 0.939 | 1.759 | 1.293 | 1.386 | 1.389 | 1.087 |

Electronic supplementary information for *PCCP*

|       |       |       |       |       |       |       |
|-------|-------|-------|-------|-------|-------|-------|
| 3.485 | 0.939 | 1.749 | 1.245 | 1.465 | 1.485 | 1.123 |
| 3.528 | 0.950 | 1.687 | 1.215 | 1.711 | 1.486 | 1.147 |
| 3.572 | 0.968 | 1.665 | 1.200 | 1.622 | 1.466 | 1.166 |
| 3.615 | 0.974 | 1.670 | 1.183 | 1.653 | 1.441 | 1.186 |
| 3.659 | 1.029 | 1.632 | 1.140 | 1.515 | 1.427 | 1.191 |
| 3.703 | 0.963 | 1.530 | 1.111 | 1.393 | 1.443 | 1.210 |
| 3.746 | 0.966 | 1.560 | 1.116 | 1.330 | 1.394 | 1.211 |
| 3.790 | 1.020 | 1.464 | 1.114 | 1.298 | 1.374 | 1.214 |
| 3.833 | 1.053 | 1.372 | 1.079 | 1.399 | 1.330 | 1.204 |
| 3.877 | 1.078 | 1.347 | 1.047 | 1.228 | 1.320 | 1.193 |
| 3.920 | 1.076 | 1.387 | 1.031 | 1.280 | 1.330 | 1.189 |
| 3.964 | 1.019 | 1.455 | 1.031 | 1.197 | 1.292 | 1.168 |
| 4.008 | 1.011 | 1.400 | 1.045 | 1.324 | 1.244 | 1.155 |
| 4.051 | 1.034 | 1.377 | 1.024 | 1.208 | 1.235 | 1.137 |
| 4.095 | 1.036 | 1.361 | 1.009 | 1.201 | 1.216 | 1.117 |
| 4.138 | 1.057 | 1.396 | 1.021 | 1.159 | 1.207 | 1.095 |
| 4.182 | 1.077 | 1.353 | 0.992 | 1.345 | 1.195 | 1.077 |
| 4.225 | 1.110 | 1.227 | 0.997 | 1.213 | 1.193 | 1.047 |
| 4.269 | 1.079 | 1.226 | 0.992 | 1.098 | 1.185 | 1.039 |
| 4.312 | 1.032 | 1.193 | 0.976 | 1.055 | 1.157 | 1.040 |
| 4.356 | 1.045 | 1.165 | 0.966 | 0.946 | 1.114 | 1.039 |
| 4.400 | 1.005 | 1.104 | 0.954 | 1.054 | 1.089 | 1.027 |
| 4.443 | 0.992 | 1.101 | 0.948 | 1.070 | 1.074 | 1.010 |
| 4.487 | 0.929 | 1.017 | 0.963 | 1.035 | 1.040 | 1.003 |
| 4.530 | 0.937 | 1.036 | 0.958 | 1.066 | 1.048 | 1.008 |
| 4.574 | 0.942 | 1.009 | 0.950 | 0.942 | 1.061 | 1.000 |
| 4.617 | 0.964 | 0.925 | 0.938 | 0.950 | 1.037 | 0.989 |
| 4.661 | 0.901 | 0.940 | 0.942 | 0.992 | 1.044 | 0.992 |
| 4.704 | 0.907 | 0.955 | 0.950 | 0.971 | 1.008 | 0.982 |
| 4.748 | 0.872 | 0.948 | 0.955 | 0.865 | 0.981 | 0.981 |
| 4.792 | 0.892 | 0.906 | 0.961 | 0.790 | 0.962 | 0.970 |
| 4.835 | 0.900 | 0.894 | 0.962 | 0.799 | 0.953 | 0.970 |
| 4.879 | 0.911 | 0.865 | 0.970 | 0.707 | 0.944 | 0.977 |
| 4.922 | 0.907 | 0.874 | 0.975 | 0.824 | 0.950 | 0.962 |
| 4.966 | 0.876 | 0.857 | 0.979 | 0.916 | 0.940 | 0.967 |
| 5.009 | 0.886 | 0.881 | 0.979 | 0.768 | 0.959 | 0.970 |
| 5.053 | 0.878 | 0.851 | 0.969 | 0.780 | 0.925 | 0.962 |
| 5.097 | 0.844 | 0.859 | 0.955 | 0.872 | 0.911 | 0.948 |
| 5.140 | 0.858 | 0.824 | 0.959 | 0.782 | 0.913 | 0.957 |
| 5.184 | 0.873 | 0.839 | 0.951 | 0.884 | 0.910 | 0.946 |
| 5.227 | 0.872 | 0.876 | 0.955 | 0.887 | 0.898 | 0.953 |
| 5.271 | 0.865 | 0.841 | 0.950 | 0.858 | 0.905 | 0.947 |
| 5.314 | 0.852 | 0.834 | 0.962 | 0.883 | 0.898 | 0.958 |
| 5.358 | 0.898 | 0.854 | 0.956 | 0.789 | 0.905 | 0.953 |
| 5.401 | 0.954 | 0.847 | 0.956 | 0.800 | 0.882 | 0.949 |
| 5.445 | 0.968 | 0.903 | 0.955 | 0.823 | 0.893 | 0.955 |
| 5.489 | 0.980 | 0.854 | 0.960 | 0.824 | 0.888 | 0.958 |
| 5.532 | 0.970 | 0.858 | 0.966 | 0.808 | 0.879 | 0.969 |
| 5.576 | 0.978 | 0.848 | 0.976 | 0.765 | 0.895 | 0.962 |
| 5.619 | 0.985 | 0.782 | 0.970 | 0.803 | 0.905 | 0.964 |
| 5.663 | 1.013 | 0.786 | 0.970 | 0.853 | 0.894 | 0.966 |
| 5.706 | 1.064 | 0.823 | 0.973 | 0.826 | 0.900 | 0.968 |
| 5.750 | 1.046 | 0.854 | 0.974 | 0.869 | 0.908 | 0.978 |
| 5.793 | 1.067 | 0.866 | 0.980 | 0.877 | 0.923 | 0.982 |
| 5.837 | 1.058 | 0.888 | 0.987 | 0.857 | 0.911 | 0.989 |

Electronic supplementary information for *PCCP*

|       |       |       |       |       |       |       |
|-------|-------|-------|-------|-------|-------|-------|
| 5.881 | 1.063 | 0.939 | 0.992 | 0.948 | 0.914 | 0.996 |
| 5.924 | 1.068 | 0.930 | 0.993 | 1.115 | 0.898 | 0.997 |
| 5.968 | 1.048 | 0.955 | 0.974 | 1.065 | 0.925 | 1.000 |
| 6.011 | 1.042 | 0.933 | 0.990 | 0.978 | 0.928 | 0.987 |
| 6.055 | 1.066 | 0.978 | 0.991 | 1.001 | 0.951 | 0.994 |
| 6.098 | 1.068 | 0.960 | 0.996 | 1.059 | 0.960 | 0.995 |
| 6.142 | 1.114 | 0.997 | 0.993 | 1.115 | 0.950 | 0.984 |
| 6.186 | 1.098 | 1.009 | 1.014 | 1.139 | 0.968 | 0.980 |
| 6.229 | 1.099 | 0.993 | 1.019 | 1.044 | 0.939 | 0.978 |
| 6.273 | 1.023 | 1.065 | 1.017 | 1.063 | 0.942 | 0.988 |
| 6.316 | 1.027 | 1.014 | 1.031 | 1.122 | 0.961 | 0.976 |
| 6.360 | 1.064 | 0.975 | 1.024 | 1.126 | 0.975 | 0.982 |
| 6.403 | 1.045 | 0.976 | 1.011 | 1.179 | 0.971 | 0.974 |
| 6.447 | 1.065 | 0.995 | 0.994 | 1.283 | 0.983 | 0.987 |
| 6.490 | 1.069 | 0.948 | 1.015 | 1.307 | 1.004 | 0.976 |
| 6.534 | 0.997 | 0.996 | 0.990 | 1.348 | 1.005 | 0.968 |
| 6.578 | 0.955 | 1.028 | 0.994 | 1.329 | 0.998 | 0.967 |
| 6.621 | 0.963 | 0.981 | 0.979 | 1.266 | 1.004 | 0.971 |
| 6.665 | 0.973 | 0.959 | 0.976 | 1.206 | 1.023 | 0.979 |
| 6.708 | 0.999 | 1.020 | 0.958 | 1.156 | 1.059 | 0.982 |
| 6.752 | 0.941 | 1.086 | 0.988 | 1.315 | 1.076 | 0.994 |
| 6.795 | 0.947 | 1.049 | 0.964 | 1.457 | 1.082 | 1.000 |
| 6.839 | 0.931 | 1.035 | 0.919 | 1.225 | 1.071 | 0.983 |
| 6.882 | 0.862 | 1.055 | 0.954 | 1.307 | 1.077 | 0.988 |
| 6.926 | 0.866 | 1.015 | 0.959 | 1.129 | 1.067 | 0.960 |
| 6.970 | 0.867 | 0.996 | 0.959 | 1.064 | 1.072 | 0.958 |

system 10:22 DCl:D2O, 909K, RDF

| r [Å] | g(O,O) | g(O,Cl) | g(O,D) | g(Cl,Cl) | g(Cl,D) | g(D,D) |
|-------|--------|---------|--------|----------|---------|--------|
| 0.044 | 0.000  | 0.000   | 0.000  | 0.000    | 0.000   | 0.000  |
| 0.087 | 0.000  | 0.000   | 0.000  | 0.000    | 0.000   | 0.000  |
| 0.131 | 0.000  | 0.000   | 0.000  | 0.000    | 0.000   | 0.000  |
| 0.174 | 0.000  | 0.000   | 0.000  | 0.000    | 0.000   | 0.000  |
| 0.218 | 0.000  | 0.000   | 0.000  | 0.000    | 0.000   | 0.000  |
| 0.261 | 0.000  | 0.000   | 0.000  | 0.000    | 0.000   | 0.000  |
| 0.305 | 0.000  | 0.000   | 0.000  | 0.000    | 0.000   | 0.000  |
| 0.349 | 0.000  | 0.000   | 0.000  | 0.000    | 0.000   | 0.000  |
| 0.392 | 0.000  | 0.000   | 0.000  | 0.000    | 0.000   | 0.000  |
| 0.436 | 0.000  | 0.000   | 0.000  | 0.000    | 0.000   | 0.000  |
| 0.479 | 0.000  | 0.000   | 0.000  | 0.000    | 0.000   | 0.000  |
| 0.523 | 0.000  | 0.000   | 0.000  | 0.000    | 0.000   | 0.000  |
| 0.566 | 0.000  | 0.000   | 0.000  | 0.000    | 0.000   | 0.000  |
| 0.610 | 0.000  | 0.000   | 0.000  | 0.000    | 0.000   | 0.000  |
| 0.653 | 0.000  | 0.000   | 0.000  | 0.000    | 0.000   | 0.000  |
| 0.697 | 0.000  | 0.000   | 0.000  | 0.000    | 0.000   | 0.000  |
| 0.741 | 0.000  | 0.000   | 0.000  | 0.000    | 0.000   | 0.000  |
| 0.784 | 0.000  | 0.000   | 0.000  | 0.000    | 0.000   | 0.000  |
| 0.828 | 0.000  | 0.000   | 0.000  | 0.000    | 0.000   | 0.000  |
| 0.871 | 0.000  | 0.000   | 0.081  | 0.000    | 0.000   | 0.000  |
| 0.915 | 0.000  | 0.000   | 2.431  | 0.000    | 0.000   | 0.000  |
| 0.958 | 0.000  | 0.000   | 13.631 | 0.000    | 0.000   | 0.000  |
| 1.002 | 0.000  | 0.000   | 25.834 | 0.000    | 0.000   | 0.000  |
| 1.045 | 0.000  | 0.000   | 18.691 | 0.000    | 0.000   | 0.000  |
| 1.089 | 0.000  | 0.000   | 7.553  | 0.000    | 0.000   | 0.000  |
| 1.133 | 0.000  | 0.000   | 3.026  | 0.000    | 0.000   | 0.000  |

Electronic supplementary information for *PCCP*

|       |       |       |       |       |       |       |
|-------|-------|-------|-------|-------|-------|-------|
| 1.176 | 0.000 | 0.000 | 1.311 | 0.000 | 0.098 | 0.000 |
| 1.220 | 0.000 | 0.000 | 0.815 | 0.000 | 0.647 | 0.000 |
| 1.263 | 0.000 | 0.000 | 0.606 | 0.000 | 1.897 | 0.005 |
| 1.307 | 0.000 | 0.000 | 0.459 | 0.000 | 2.898 | 0.032 |
| 1.350 | 0.000 | 0.000 | 0.430 | 0.000 | 2.970 | 0.122 |
| 1.394 | 0.000 | 0.000 | 0.451 | 0.000 | 2.064 | 0.312 |
| 1.438 | 0.000 | 0.000 | 0.449 | 0.000 | 1.308 | 0.605 |
| 1.481 | 0.000 | 0.000 | 0.444 | 0.000 | 0.784 | 1.056 |
| 1.525 | 0.000 | 0.000 | 0.475 | 0.000 | 0.658 | 1.501 |
| 1.568 | 0.000 | 0.000 | 0.459 | 0.000 | 0.469 | 1.852 |
| 1.612 | 0.000 | 0.000 | 0.443 | 0.000 | 0.390 | 1.999 |
| 1.655 | 0.000 | 0.000 | 0.459 | 0.000 | 0.357 | 1.852 |
| 1.699 | 0.000 | 0.000 | 0.444 | 0.000 | 0.340 | 1.574 |
| 1.742 | 0.000 | 0.000 | 0.444 | 0.000 | 0.352 | 1.301 |
| 1.786 | 0.000 | 0.000 | 0.487 | 0.000 | 0.394 | 1.009 |
| 1.830 | 0.000 | 0.000 | 0.497 | 0.000 | 0.404 | 0.892 |
| 1.873 | 0.000 | 0.000 | 0.492 | 0.000 | 0.415 | 0.805 |
| 1.917 | 0.000 | 0.000 | 0.493 | 0.000 | 0.478 | 0.754 |
| 1.960 | 0.000 | 0.000 | 0.474 | 0.000 | 0.493 | 0.730 |
| 2.004 | 0.000 | 0.000 | 0.479 | 0.000 | 0.493 | 0.745 |
| 2.047 | 0.000 | 0.000 | 0.454 | 0.000 | 0.521 | 0.747 |
| 2.091 | 0.000 | 0.000 | 0.436 | 0.000 | 0.547 | 0.762 |
| 2.134 | 0.000 | 0.000 | 0.436 | 0.000 | 0.573 | 0.772 |
| 2.178 | 0.000 | 0.000 | 0.438 | 0.000 | 0.624 | 0.841 |
| 2.222 | 0.000 | 0.000 | 0.446 | 0.000 | 0.691 | 0.835 |
| 2.265 | 0.059 | 0.000 | 0.453 | 0.000 | 0.700 | 0.859 |
| 2.309 | 0.256 | 0.000 | 0.469 | 0.000 | 0.699 | 0.872 |
| 2.352 | 0.382 | 0.000 | 0.506 | 0.000 | 0.712 | 0.869 |
| 2.396 | 0.575 | 0.000 | 0.534 | 0.000 | 0.733 | 0.870 |
| 2.439 | 0.916 | 0.000 | 0.550 | 0.000 | 0.721 | 0.871 |
| 2.483 | 1.108 | 0.008 | 0.571 | 0.000 | 0.720 | 0.864 |
| 2.527 | 1.300 | 0.033 | 0.612 | 0.000 | 0.740 | 0.887 |
| 2.570 | 1.422 | 0.041 | 0.671 | 0.000 | 0.726 | 0.889 |
| 2.614 | 1.406 | 0.130 | 0.715 | 0.000 | 0.721 | 0.912 |
| 2.657 | 1.492 | 0.263 | 0.785 | 0.000 | 0.737 | 0.915 |
| 2.701 | 1.663 | 0.441 | 0.815 | 0.000 | 0.759 | 0.920 |
| 2.744 | 1.727 | 0.638 | 0.885 | 0.000 | 0.827 | 0.915 |
| 2.788 | 1.783 | 0.867 | 0.933 | 0.000 | 0.773 | 0.902 |
| 2.831 | 1.737 | 0.984 | 1.012 | 0.000 | 0.845 | 0.939 |
| 2.875 | 1.751 | 1.005 | 1.054 | 0.016 | 0.875 | 0.925 |
| 2.919 | 1.673 | 1.238 | 1.090 | 0.089 | 0.885 | 0.946 |
| 2.962 | 1.747 | 1.332 | 1.158 | 0.480 | 0.962 | 0.963 |
| 3.006 | 1.680 | 1.501 | 1.203 | 0.730 | 1.020 | 0.962 |
| 3.049 | 1.551 | 1.631 | 1.245 | 0.824 | 1.061 | 0.976 |
| 3.093 | 1.495 | 1.714 | 1.259 | 1.135 | 1.083 | 0.991 |
| 3.136 | 1.542 | 1.807 | 1.271 | 1.050 | 1.075 | 0.992 |
| 3.180 | 1.395 | 1.832 | 1.278 | 1.468 | 1.134 | 1.014 |
| 3.223 | 1.372 | 1.997 | 1.290 | 1.841 | 1.146 | 1.033 |
| 3.267 | 1.363 | 1.903 | 1.289 | 1.891 | 1.162 | 1.050 |
| 3.311 | 1.353 | 1.826 | 1.283 | 1.644 | 1.221 | 1.075 |
| 3.354 | 1.244 | 1.834 | 1.278 | 1.750 | 1.233 | 1.098 |
| 3.398 | 1.307 | 1.786 | 1.287 | 1.535 | 1.237 | 1.098 |
| 3.441 | 1.227 | 1.728 | 1.264 | 1.654 | 1.225 | 1.098 |
| 3.485 | 1.202 | 1.573 | 1.233 | 1.717 | 1.282 | 1.114 |
| 3.528 | 1.102 | 1.604 | 1.225 | 1.687 | 1.253 | 1.126 |

This Journal is © the Owner Societies 2004

Electronic supplementary information for *PCCP*

|       |       |       |       |       |       |       |
|-------|-------|-------|-------|-------|-------|-------|
| 3.572 | 1.129 | 1.608 | 1.200 | 1.700 | 1.264 | 1.106 |
| 3.615 | 1.070 | 1.470 | 1.206 | 1.727 | 1.254 | 1.097 |
| 3.659 | 1.078 | 1.436 | 1.184 | 1.786 | 1.208 | 1.121 |
| 3.703 | 1.015 | 1.542 | 1.178 | 1.716 | 1.237 | 1.114 |
| 3.746 | 1.013 | 1.507 | 1.134 | 1.606 | 1.249 | 1.116 |
| 3.790 | 1.017 | 1.453 | 1.103 | 1.454 | 1.265 | 1.100 |
| 3.833 | 1.006 | 1.342 | 1.083 | 1.295 | 1.242 | 1.109 |
| 3.877 | 1.025 | 1.315 | 1.083 | 1.269 | 1.237 | 1.090 |
| 3.920 | 0.926 | 1.219 | 1.071 | 1.359 | 1.202 | 1.098 |
| 3.964 | 0.919 | 1.163 | 1.058 | 1.209 | 1.195 | 1.092 |
| 4.008 | 0.955 | 1.161 | 1.064 | 1.395 | 1.197 | 1.068 |
| 4.051 | 0.931 | 1.064 | 1.043 | 1.304 | 1.205 | 1.077 |
| 4.095 | 0.937 | 1.097 | 1.044 | 1.351 | 1.197 | 1.064 |
| 4.138 | 0.890 | 1.067 | 1.006 | 1.181 | 1.152 | 1.057 |
| 4.182 | 0.942 | 1.096 | 1.002 | 1.196 | 1.122 | 1.046 |
| 4.225 | 0.934 | 1.043 | 0.993 | 1.122 | 1.120 | 1.026 |
| 4.269 | 0.865 | 1.110 | 0.978 | 1.061 | 1.126 | 1.028 |
| 4.312 | 0.834 | 1.090 | 0.964 | 0.926 | 1.079 | 1.034 |
| 4.356 | 0.858 | 0.989 | 0.944 | 0.924 | 1.077 | 1.028 |
| 4.400 | 0.810 | 0.978 | 0.951 | 1.032 | 1.038 | 1.016 |
| 4.443 | 0.814 | 0.992 | 0.948 | 0.944 | 1.063 | 1.005 |
| 4.487 | 0.825 | 0.903 | 0.950 | 0.891 | 1.047 | 1.009 |
| 4.530 | 0.814 | 0.909 | 0.943 | 0.818 | 1.054 | 0.987 |
| 4.574 | 0.800 | 0.863 | 0.939 | 0.801 | 1.030 | 0.993 |
| 4.617 | 0.857 | 0.915 | 0.933 | 0.790 | 1.010 | 0.988 |
| 4.661 | 0.833 | 0.866 | 0.934 | 0.744 | 1.013 | 0.984 |
| 4.704 | 0.875 | 0.883 | 0.928 | 0.832 | 0.981 | 0.986 |
| 4.748 | 0.861 | 0.905 | 0.924 | 0.825 | 1.004 | 0.989 |
| 4.792 | 0.864 | 0.841 | 0.915 | 0.982 | 0.966 | 0.981 |
| 4.835 | 0.859 | 0.882 | 0.905 | 0.890 | 0.955 | 0.970 |
| 4.879 | 0.875 | 0.899 | 0.901 | 0.911 | 0.958 | 0.966 |
| 4.922 | 0.813 | 0.865 | 0.897 | 0.797 | 0.951 | 0.979 |
| 4.966 | 0.810 | 0.909 | 0.895 | 0.729 | 0.940 | 0.976 |
| 5.009 | 0.822 | 0.882 | 0.901 | 0.860 | 0.928 | 0.973 |
| 5.053 | 0.915 | 0.859 | 0.906 | 0.765 | 0.916 | 0.954 |
| 5.097 | 0.883 | 0.821 | 0.914 | 0.795 | 0.921 | 0.956 |
| 5.140 | 0.872 | 0.824 | 0.929 | 0.766 | 0.925 | 0.957 |
| 5.184 | 0.840 | 0.812 | 0.934 | 0.788 | 0.915 | 0.935 |
| 5.227 | 0.906 | 0.892 | 0.946 | 0.802 | 0.913 | 0.934 |
| 5.271 | 0.889 | 0.895 | 0.956 | 0.771 | 0.948 | 0.941 |
| 5.314 | 0.919 | 0.938 | 0.954 | 0.790 | 0.935 | 0.944 |
| 5.358 | 1.012 | 0.904 | 0.953 | 0.756 | 0.922 | 0.954 |
| 5.401 | 1.018 | 0.933 | 0.971 | 0.836 | 0.939 | 0.954 |
| 5.445 | 1.006 | 0.964 | 0.966 | 0.794 | 0.953 | 0.948 |
| 5.489 | 1.029 | 0.970 | 0.958 | 0.758 | 0.968 | 0.947 |
| 5.532 | 1.017 | 1.038 | 0.969 | 0.716 | 0.954 | 0.960 |
| 5.576 | 1.036 | 1.044 | 0.970 | 0.679 | 0.959 | 0.966 |
| 5.619 | 1.048 | 1.110 | 0.991 | 0.534 | 0.952 | 0.971 |
| 5.663 | 1.034 | 1.058 | 0.992 | 0.649 | 0.965 | 0.962 |
| 5.706 | 1.035 | 1.027 | 0.997 | 0.773 | 0.977 | 0.959 |
| 5.750 | 1.050 | 1.052 | 1.004 | 0.832 | 0.990 | 0.961 |
| 5.793 | 1.048 | 1.063 | 0.993 | 0.987 | 0.966 | 0.968 |
| 5.837 | 1.037 | 1.123 | 1.013 | 0.782 | 0.984 | 0.974 |
| 5.881 | 1.096 | 1.026 | 1.017 | 0.908 | 1.000 | 0.972 |
| 5.924 | 1.143 | 1.055 | 1.011 | 1.103 | 1.004 | 0.988 |



This Journal is © the Owner Societies 2004

Electronic supplementary information for *PCCP*

|       |       |       |       |       |       |       |
|-------|-------|-------|-------|-------|-------|-------|
| 5.968 | 1.133 | 1.080 | 1.023 | 1.122 | 1.015 | 0.992 |
| 6.011 | 1.143 | 1.145 | 1.010 | 1.191 | 1.044 | 0.990 |
| 6.055 | 1.064 | 1.140 | 1.019 | 1.072 | 1.056 | 0.999 |
| 6.098 | 1.056 | 1.078 | 1.025 | 1.133 | 1.055 | 0.987 |
| 6.142 | 1.063 | 1.078 | 1.010 | 1.105 | 1.043 | 0.989 |
| 6.186 | 1.095 | 1.046 | 0.994 | 1.105 | 1.042 | 1.019 |
| 6.229 | 1.023 | 1.086 | 1.008 | 1.284 | 1.009 | 1.011 |
| 6.273 | 1.039 | 1.078 | 1.010 | 1.054 | 0.999 | 0.999 |
| 6.316 | 0.987 | 1.128 | 0.999 | 1.035 | 1.024 | 0.990 |
| 6.360 | 0.914 | 1.218 | 1.000 | 1.083 | 1.039 | 0.999 |
| 6.403 | 0.980 | 1.185 | 0.997 | 1.049 | 1.033 | 0.997 |
| 6.447 | 1.018 | 1.160 | 0.995 | 1.026 | 1.016 | 1.013 |
| 6.490 | 0.923 | 1.074 | 0.977 | 0.925 | 1.036 | 0.998 |
| 6.534 | 0.958 | 1.052 | 0.976 | 1.236 | 0.999 | 1.004 |
| 6.578 | 0.989 | 1.011 | 0.986 | 1.207 | 0.998 | 1.002 |
| 6.621 | 0.947 | 1.019 | 0.989 | 1.213 | 1.005 | 0.996 |
| 6.665 | 0.975 | 0.987 | 0.969 | 1.252 | 1.009 | 0.977 |
| 6.708 | 0.934 | 0.942 | 0.968 | 1.029 | 0.984 | 0.985 |
| 6.752 | 1.018 | 0.993 | 0.972 | 0.923 | 0.954 | 0.988 |
| 6.795 | 1.004 | 0.979 | 0.945 | 0.816 | 0.949 | 0.992 |
| 6.839 | 0.958 | 0.955 | 0.939 | 0.854 | 0.976 | 0.995 |
| 6.882 | 0.913 | 0.928 | 0.961 | 0.866 | 0.986 | 0.962 |
| 6.926 | 0.913 | 0.855 | 0.950 | 0.676 | 0.986 | 0.959 |
| 6.970 | 0.867 | 0.920 | 0.932 | 0.882 | 0.976 | 0.958 |
